# Supplementary material for: CSF in the ventricles of the brain behaves as a relay medium for arteriovenous pulse wave phase coupling
Source: PubMed Central journal article supplement (PMC5687699; doi:10.1371/journal.pone.0181025), 2017-11-15
Supplement: pone.0181025.s001.pdf [file pone.0181025.s001.pdf]

# Human Neuro-Endoscopy — h2

Lateral Ventricle

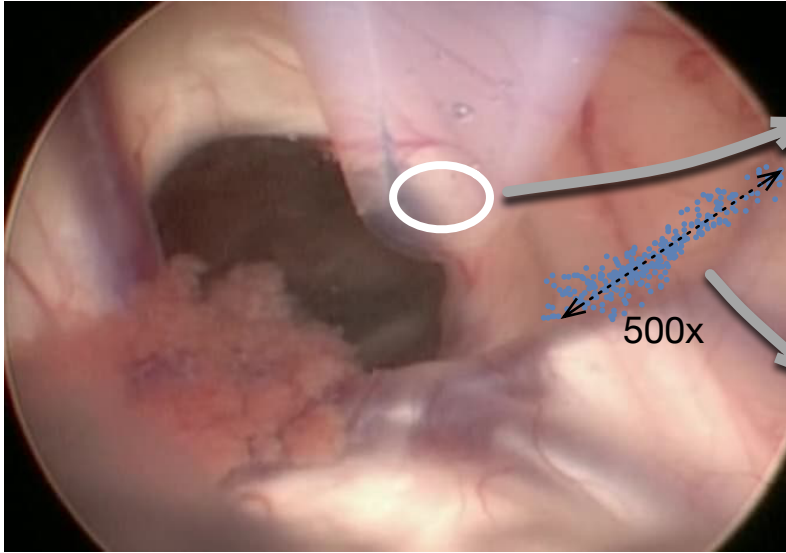

CSF Pressure

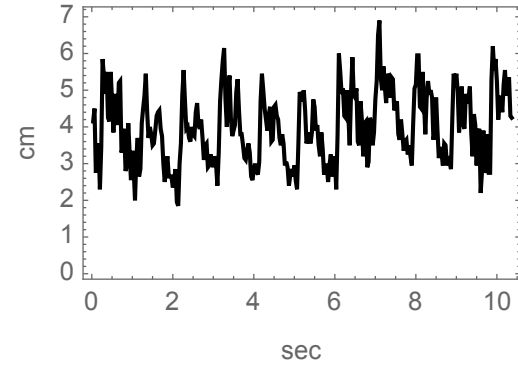

Ventricle Wall

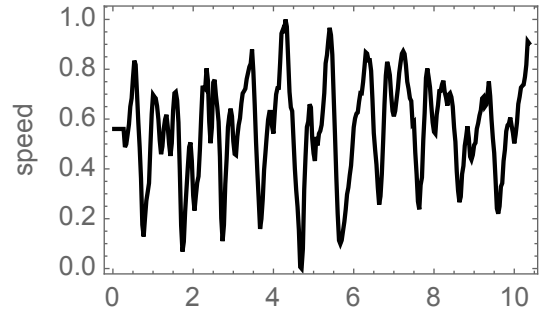

Third Ventricle

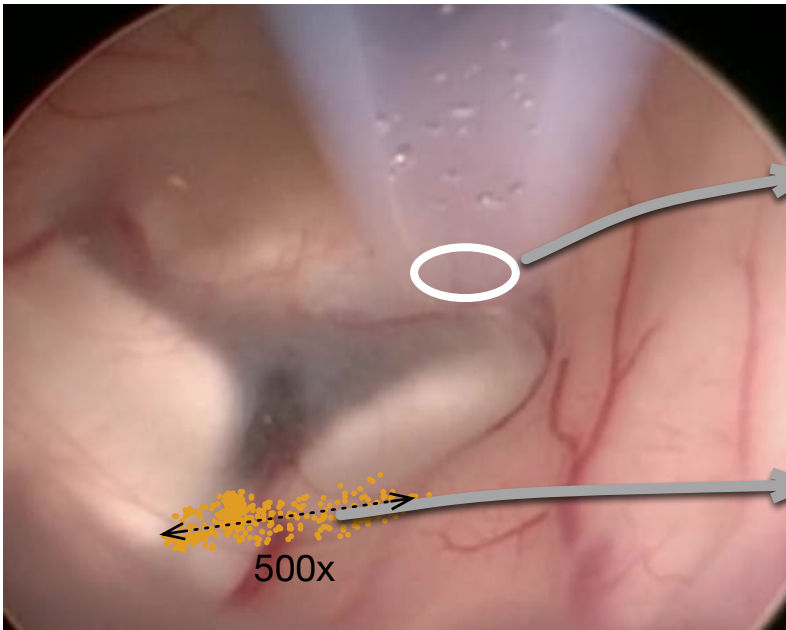

CSF Pressure

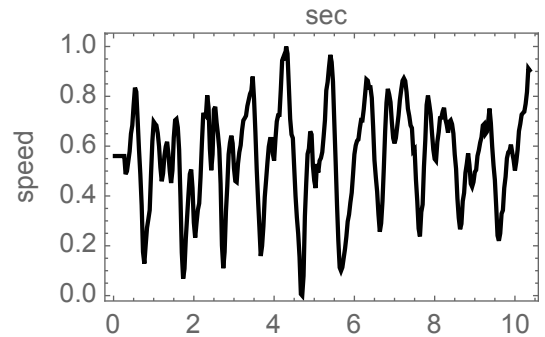

Ventricle Wall

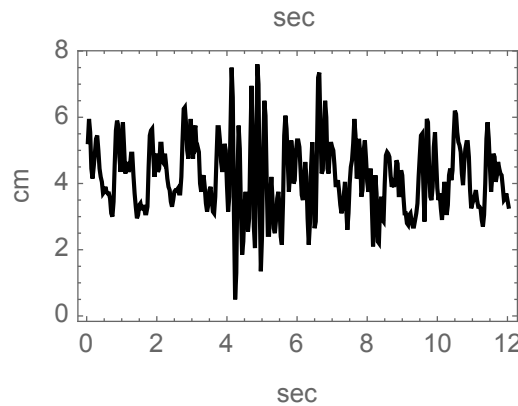

Lateral and Third Ventricle neuro-endoscope views with CSF and wall speed data for h2
