# Supplementary material for: CSF in the ventricles of the brain behaves as a relay medium for arteriovenous pulse wave phase coupling
Source: PubMed Central journal article supplement (PMC5687699; doi:10.1371/journal.pone.0181025), 2017-11-15
Supplement: pone.0181025.s004.pdf [file pone.0181025.s004.pdf]

# Motion-Referenced Vascular PW Phase

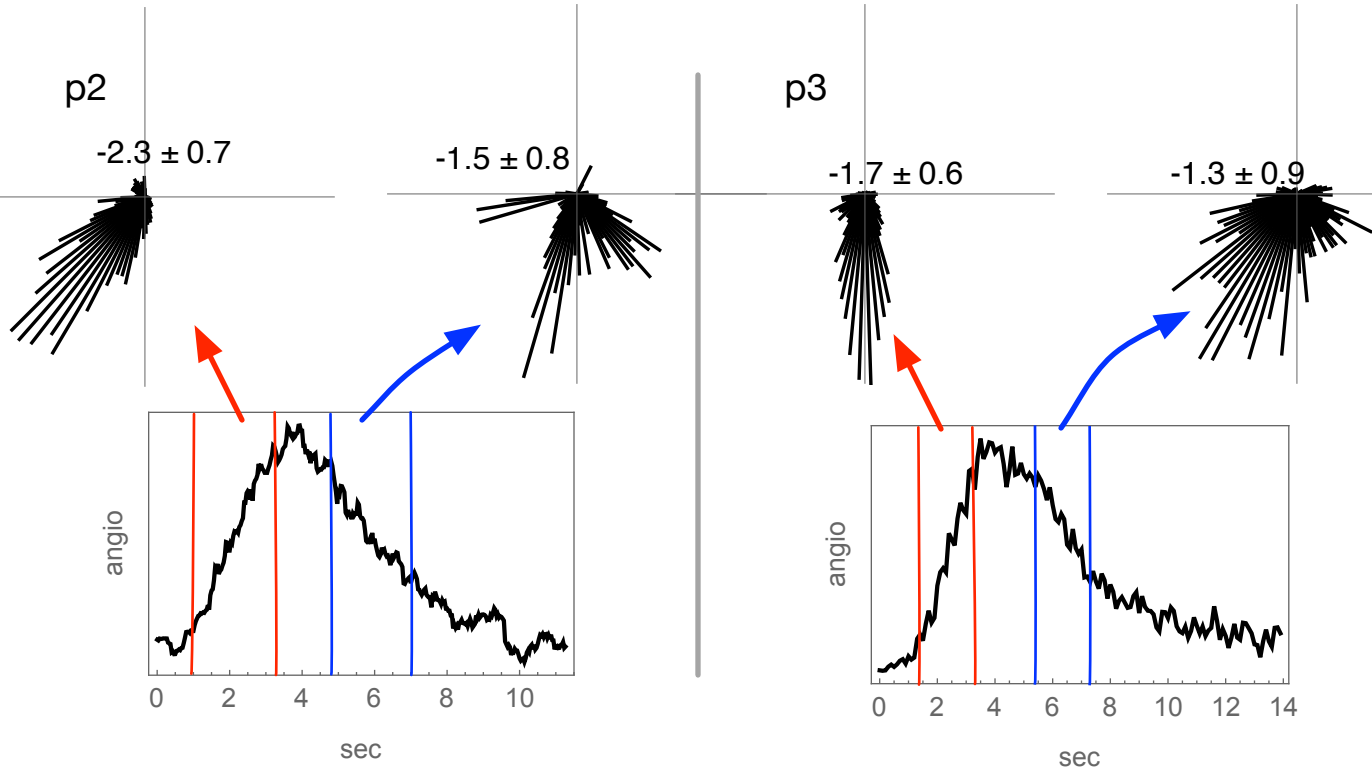

Peri-ventricular arterial versus venous PW phase for p2 and p3.
